# Supplementary material for: Association between Maternal Origin, Pre-Pregnancy Body Mass Index and Caesarean Section: A Nation-Wide Registry Study
Source: MDPI journal article supplement (doi:10.3390/ijerph18115938), 2021-06-01
Supplement: s1 [file s1]

**Table S1:** Proportions of elective and emergency CS by maternal region of origin in strata of pre-pregnancy BMI, n=118 459. (Supplementary material)

| Maternal region of origin                             | Mode of delivery        |                      |                       |
|-------------------------------------------------------|-------------------------|----------------------|-----------------------|
|                                                       | Vaginal                 | Elective CS          | Emergency CS          |
| <b>Underweight (BMI&lt;18.5 kg/m<sup>2</sup>)</b>     | <b>N=3922 (87.70%)</b>  | <b>N=143 (3.20%)</b> | <b>N=407 (9.10%)</b>  |
| Norway                                                | 1874 (88.65)            | 81 (3.83)            | 159 (7.52)            |
| High income countries                                 | 407 (49.25)             | 15 (3.29)            | 34 (7.46)             |
| Europe/ & Central Asia                                | 664 (89.01)             | 24 (3.22)            | 58 (7.77)             |
| Sub-Saharan Africa                                    | 255 (82.30)             | 9 (2.91)             | 45 (14.56)            |
| North Africa & the Middle East                        | 213 (87.30)             | 5 (2.05)             | 26 (10.66)            |
| South Asia                                            | 105 (83.33)             | 1 (0.79)             | 20 (15.56)            |
| Southeast Asia, East Asia & the Pacific               | 374 (85.58)             | 5 (1.14)             | 58 (13.27)            |
| Latin America & the Caribbean                         | 30 (75.00)              | 3 (7.50)             | 7 (17.50)             |
| <b>Normal weight (BMI 18.5-24.9 kg/m<sup>2</sup>)</b> | <b>N=50 676 (85.1%)</b> | <b>N=1744 (2.9%)</b> | <b>N=7122 (12.0%)</b> |
| Norway                                                | 31043 (86.27)           | 1055 (2.93)          | 3884 (10.79)          |
| High income countries                                 | 6624 (85.74)            | 240 (3.11)           | 862 (11.16)           |
| Europe & Central Asia                                 | 6322 (84.71)            | 249 (3.34)           | 892 (11.95)           |
| Sub-Saharan Africa                                    | 1309 (73.91)            | 31 (1.75)            | 431 (24.34)           |
| North Africa & the Middle East                        | 1872 (83.83)            | 71 (3.18)            | 290 (12.99)           |
| South Asia                                            | 917 (83.67)             | 27 (2.46)            | 152 (13.87)           |
| Southeast Asia, East Asia & the Pacific               | 2174 (79.63)            | 50 (1.83)            | 506 (18.53)           |
| Latin America & the Caribbean                         | 415 (76.71)             | 21 (3.88)            | 105 (19.41)           |
| <b>Overweight/ Obese (BMI ≥25.0 kg/m<sup>2</sup>)</b> | <b>N=21 304 (77.9)</b>  | <b>N=939 (3.4)</b>   | <b>N=5115 (18.7)</b>  |
| Norway                                                | 15 156 (79.03)          | 655 (3.42)           | 3367 (17.56)          |
| High income countries                                 | 2495 (78.04)            | 95 (2.97)            | 607 (18.99)           |
| Europe & Central Asia                                 | 1542 (77.22)            | 98 (4.91)            | 357 (17.88)           |
| Sub-Saharan Africa                                    | 482 (62.92)             | 27 (3.52)            | 257 (33.55)           |
| North Africa & the Middle East                        | 740 (75.98)             | 25 (2.57)            | 209 (21.46)           |
| South Asia                                            | 318 (70.20)             | 18 (3.97)            | 117 (25.83)           |
| Southeast Asia, East Asia & the Pacific               | 444 (72.31)             | 16 (2.61)            | 154 (25.08)           |
| Latin America & the Caribbean                         | 127 (70.95)             | 5 (2.79)             | 47 (26.26)            |
| <b>Missing BMI</b>                                    | <b>N=22 345 (82.5)</b>  | <b>N=990 (3.7)</b>   | <b>N=3752 (13.85)</b> |
| Norway                                                | 13 994 (83.45)          | 623 (3.72)           | 2152 (12.83)          |
| High income countries                                 | 2812 (82.78)            | 139 (4.09)           | 446 (13.13)           |
| Europe & Central Asia                                 | 2259 (83.70)            | 105 (3.89)           | 335 (12.41)           |
| Sub-Saharan Africa                                    | 789 (73.74)             | 22 (2.06)            | 259 (24.41)           |
| North Africa & the Middle East                        | 945 (82.10)             | 41 (3.56)            | 165 (14.34)           |
| South Asia                                            | 487 (80.90)             | 12 (1.99)            | 103 (17.11)           |
| Southeast Asia, East Asia & the Pacific               | 855 (76.82)             | 38 (3.41)            | 220 (19.77)           |
| Latin America & the Caribbean                         | 204 (71.33)             | 10 (3.50)            | 72 (25.17)            |
